# Supplementary material
Source: publisher site journal article supplement (https://www.dovepress.com/article/276639)
Supplement: Supplementary file 1 [file get_supplementary_file.php]

**Table S1.** Comparison of SES Characteristics Between the Rural and Urban Areas

|  | Rural  (n=3,114) | Urban  (n=3,227) | Total  (n=6,341) | p-value |
| --- | --- | --- | --- | --- |
|
| Household income  quartile, N (%) |  |  |  | < 0.001 |
| 1st | 1619 (53.4) | 351 (10.9) | 1970 (31.6) |  |
| 2nd | 909 (30.0) | 970 (30.3) | 1879 (30.1) |  |
| 3rd | 422 (13.9) | 1454 (45.4) | 1876 (30.1) |  |
| 4th | 79 (2.6) | 431 (13.4) | 510 (8.2) |  |
| Education level, N (%) |  |  |  | < 0.001 |
| Elementary school | 1483 (48.1) | 398 (12.4) | 1881 (29.8) |  |
| Middle school | 797 (25.8) | 644 (20.0) | 1441(22.8) |  |
| High school | 599 (19.4) | 1439 (44.7) | 2038 (32.3) |  |
| College | 206 ( 6.7) | 741 (23.0) | 947 (15.0) |  |
